# Supplementary material
Source: MDPI journal article supplement (https://www.mdpi.com/1996-1073/14/2/262)
Supplement: s1 [file s1]

## **Supplementary Materials** to the article

### **An Integrated Comparative Assessment of Coal-Based Carbon Capture and Storage (CCS) vis-à-vis Renewable Energies in India's Low Carbon Electricity Transition Scenarios**

Mitavachan Hiremath<sup>12\*</sup>, Peter Viebahn<sup>1</sup>, Sascha Samadi<sup>1</sup>

<sup>1</sup>Wuppertal Institute for Climate, Environment and Energy

<sup>2</sup>Center for Sustainability, Policy & Technology Management (SusPoT)

\* Correspondence: [mitavachan@suspot.org](mailto:mitavachan@suspot.org)

#### **S1: Assumptions for estimating the CO<sub>2</sub> storage demand from all the coal-CCS plants built until 2050.**

3 End Points of Coal-CCS capacity by 2050 are considered: 35/80/150 GW

CO<sub>2</sub> emissions per kwh-thermal: 344 gCO<sub>2</sub> / kWh-th

Average Efficiency of coal-CCS plants: 35%

CO<sub>2</sub> capture rate: 90%

Power plant capacity utilization factor (CUF): 80%

Lifetime of coal-CCS power plant: 40 years

## S2: Levelized Costs

**Table S2.1: Data and assumptions used for estimating the levelized costs of future coal power generation in India.**

| Parameters              | Unit            | 2020 (2050) <sup>#</sup><br>Low/Mean/High |         |         | References & Comments                                                                                                                                                                                                                                                                                        |
|-------------------------|-----------------|-------------------------------------------|---------|---------|--------------------------------------------------------------------------------------------------------------------------------------------------------------------------------------------------------------------------------------------------------------------------------------------------------------|
| General cost parameters |                 |                                           |         |         |                                                                                                                                                                                                                                                                                                              |
| Capex<br>(Overnight)    | \$/kW           | 1,044                                     | 1,200   | 1,200   | [1–3]<br>We assume that the increasing environmental norms will nullify the cost reductions achieved from coal technology’s learning rate (if any) and moreover super-critical coal technologies can already be considered as mature technologies. So, the capex costs are assumed to remain same till 2050. |
| Cost Overruns           | %Capex          | 5%                                        | 5%      | 20%     | [4,5]<br>It seems cost overruns for Indian coal power plants are on the higher side [5]; however, we keep the low and mean values same (5%; [4]).                                                                                                                                                            |
| Opex<br>(Fixed)         | \$/kW-<br>annum | 42                                        | 48      | 50      | [4,6]<br>Opex (Fixed) are the annual fixed maintenance costs averaged across a time period of 25 years.<br>Low/Mean – 4% Capex/annum<br>High – 4.2% Capex/annum                                                                                                                                              |
| Opex<br>(Variable)      | \$/MWh          | 2.5 (5)                                   |         |         | [4,7]<br>Minimum value from [4]; assumed to increase from 2.5\$ in 2020 to 3\$ (2030) to 5\$ (2050) [7] because of escalating water and oil prices, among others.                                                                                                                                            |
| Fuel Costs              | \$/MWh          | 19 (60)                                   | 22 (55) | 28 (50) | Authors’ estimates based on the data in below section “Fuel Costs Assumptions”.                                                                                                                                                                                                                              |
| Carbon Costs            | \$/ton          | 49                                        | 86      | 157     | [8]<br>Here we account for the social costs of carbon emissions indicating the climate damage associated with every additional tonne of carbon dioxide emitted into the atmosphere. Note these costs are independent of the                                                                                  |

| Parameters                              | Unit   | 2020 (2050) <sup>#</sup><br>Low/Mean/High |           |           | References & Comments                                                                                                                                                                                                                                                                                                                                  |
|-----------------------------------------|--------|-------------------------------------------|-----------|-----------|--------------------------------------------------------------------------------------------------------------------------------------------------------------------------------------------------------------------------------------------------------------------------------------------------------------------------------------------------------|
|                                         |        |                                           |           |           | carbon market prices and their future fluctuations or carbon penalties introduced by governmental regulations.                                                                                                                                                                                                                                         |
| Systems Costs                           | \$/MWh | 5.6                                       |           |           | [9]<br>We account for the grid extension and reinforcement costs only; balancing costs for coal power plants are ignored.                                                                                                                                                                                                                              |
| Discounting                             |        |                                           |           |           |                                                                                                                                                                                                                                                                                                                                                        |
| Depreciation Period (N)                 | Years  | 25                                        |           |           | We have kept 25 years depreciation period constant across all technologies.                                                                                                                                                                                                                                                                            |
| Weighted Average Cost of Capital (WACC) | %      | 11%                                       | 13%       | 14%       | [5,6,10]<br>As investors increasingly perceive financing coal power plants to be more risky [10], we expect WACC to go further high in the next years. Hence, we assume 14% on the higher side.                                                                                                                                                        |
| Technical Parameters                    |        |                                           |           |           |                                                                                                                                                                                                                                                                                                                                                        |
| Efficiency                              | %      | 39% (40%)                                 | 40% (41%) | 41% (42%) | [3,4,6]<br>Efficiency values are assumed to rise by 1%-point by 2030 and then stabilize.                                                                                                                                                                                                                                                               |
| Capacity Utilization Factor (CUF)       | %      | 80%                                       | 72%       | 60%       | [1,5,6]<br>Based on the projections and estimates in National Electricity Plan [1], we assume 60% as a lower value for supercritical coal power plants in India. However, [1] estimates that overall CUF for coal power plants in India may possibly come down to 56.5% by 2021-22 under the influence of renewable capacity additions in the country. |
| Fuel Costs Assumptions                  |        |                                           |           |           |                                                                                                                                                                                                                                                                                                                                                        |
| Import Share                            | %      | 0                                         | 30        | 100       |                                                                                                                                                                                                                                                                                                                                                        |
| Net calorific value for Indian coal     | MJ/kg  | 18                                        |           |           | [5,11]                                                                                                                                                                                                                                                                                                                                                 |

| Parameters                            | Unit                     | 2020 (2050) <sup>#</sup><br>Low/Mean/High |          |          | References & Comments                                                                                                                                                                                                                                                                                                                                                                   |
|---------------------------------------|--------------------------|-------------------------------------------|----------|----------|-----------------------------------------------------------------------------------------------------------------------------------------------------------------------------------------------------------------------------------------------------------------------------------------------------------------------------------------------------------------------------------------|
| Net calorific value for Imported coal | MJ/kg                    | 25                                        |          |          | [6]                                                                                                                                                                                                                                                                                                                                                                                     |
| Price of hard coal                    | \$/ton                   | 36 (118)                                  | 50 (126) | 80 (145) | [2,12]<br>Three scenarios are assumed:<br>(a) Low – 100% Domestic coal fuel; Domestic coal prices are escalated by 4%/year from 2020 till 2050 [13]<br>(b) High – 100% Imported coal fuel; Imported coal prices are assumed to escalate at lower rate than domestic prices, that is, 2%/year from 2020 till 2050<br>(c) Mean – 70/30 mix of domestic (low) & imported (high) coal fuel. |
| Emission Factor                       | gCO <sub>2</sub> /kWh-th | 345                                       | 344      | 341      | [14–16]<br>Low – Domestic coal; High – Imported coal; Mean – 70/30 mix of domestic and imported coal fuel.                                                                                                                                                                                                                                                                              |

\* The values from literature are inflation adjusted to 2018 US dollars (<https://www.usinflationcalculator.com/>); wherever applicable, a historic conversion rate of 1\$ = 70 INR is assumed.

# The figures in brackets are authors' estimates for 2050; mentioned only if the figures are changed.

**Table S2.2: Data and assumptions used for estimating the levelized costs of future coal-CCS power generation in India.**

| Parameters              | Unit            | 2020 (2050) <sup>#</sup><br>Low/Mean/High |               |               | References & Comments                                                                                                                                                                                                                                                                                                                                                                                                                                                                                                                                                                                                                                                                                                                                                                                                   |
|-------------------------|-----------------|-------------------------------------------|---------------|---------------|-------------------------------------------------------------------------------------------------------------------------------------------------------------------------------------------------------------------------------------------------------------------------------------------------------------------------------------------------------------------------------------------------------------------------------------------------------------------------------------------------------------------------------------------------------------------------------------------------------------------------------------------------------------------------------------------------------------------------------------------------------------------------------------------------------------------------|
| General cost parameters |                 |                                           |               |               |                                                                                                                                                                                                                                                                                                                                                                                                                                                                                                                                                                                                                                                                                                                                                                                                                         |
| Capex<br>(Overnight)    | \$/kW           | 1,828 (1,383)                             | 3,816 (2,421) | 4,134 (3,084) | <p>[3,6]<br/>Based on [3], it is assumed that Capex of coal-CCS will reduce from \$3,816/\$4,134 per kW in 2020 to \$3,074/\$3,763 per kW in 2030 for mean and high values. Low value (\$1,828/kW) represents the Capex of retrofitting already existing super-critical coal power plants with CCS in India and is estimated based on [6]: 175% Capex without CCS.</p> <p>It is assumed that the commercialization of coal-CCS plants in India will start from 2030 onwards (best case scenario; see Section 3.1.3 in the paper for more details). From 2030 till 2050, a technology learning rate of 3.9% [6,17] is assumed for Capex and is applied according to 3 different endpoint scenarios in 2050 (150/80/35 GW), all starting with 1GW installed capacity in 2030 and straight line escalation until 2050.</p> |
| Cost Overruns           | %Capex          | 5%                                        | 5%            | 20%           | <p>[4,5]<br/>It seems cost overruns for coal based power plants in India are on the higher side [5]; however, we keep the low and mean values same (5%; [4]).</p>                                                                                                                                                                                                                                                                                                                                                                                                                                                                                                                                                                                                                                                       |
| Opex<br>(Fixed)         | \$/kW-<br>annum | 76 (50)                                   | 88 (61)       | 92 (68)       | <p>[6]<br/>183% of Opex without CCS is assumed, and a learning rate of 5.8% is applied from 2030 till 2050 (similarly as indicated for Capex above).</p>                                                                                                                                                                                                                                                                                                                                                                                                                                                                                                                                                                                                                                                                |
| Opex<br>(Variable)      | \$/MWh          | 4.6 (9.2)                                 |               |               | <p>[6]<br/>Assumed to be 183% of Opex (variable) without CCS.</p>                                                                                                                                                                                                                                                                                                                                                                                                                                                                                                                                                                                                                                                                                                                                                       |
| Fuel Costs              |                 | 25 (72)                                   | 28 (63)       | 35 (56)       | Authors’ estimates based on the below mentioned coal fuel data and assumptions.                                                                                                                                                                                                                                                                                                                                                                                                                                                                                                                                                                                                                                                                                                                                         |

| Parameters                              | Unit   | 2020 (2050) <sup>#</sup><br>Low/Mean/High |             |             | References & Comments                                                                                                                                                                                                                                                                                                                      |
|-----------------------------------------|--------|-------------------------------------------|-------------|-------------|--------------------------------------------------------------------------------------------------------------------------------------------------------------------------------------------------------------------------------------------------------------------------------------------------------------------------------------------|
| Carbon Costs                            | \$/ton | 49                                        | 86          | 157         | [8]<br>Here we account for the social costs of carbon emissions indicating the climate damage associated with every additional tonne of carbon dioxide emitted into the atmosphere. Note these costs are independent of the carbon market prices and their future fluctuations or carbon penalties introduced by governmental regulations. |
| Systems Costs                           | \$/MWh | 5.6                                       |             |             | [9]<br>We account for the grid extension and reinforcement costs only; balancing costs for coal-CCS power plants are ignored.                                                                                                                                                                                                              |
| Discounting                             |        |                                           |             |             |                                                                                                                                                                                                                                                                                                                                            |
| Depreciation Period (N)                 | Years  | 25                                        |             |             | We have kept 25 years depreciation period constant across all technologies.                                                                                                                                                                                                                                                                |
| Weighted Average Cost of Capital (WACC) | %      | 11%                                       | 13%         | 14%         | [5,6,10]<br>As investors increasingly perceive financing coal based plants to be more risky [10], we expect WACC to go further high in the next years. Hence, we assume 14% on the higher side.                                                                                                                                            |
| Technical Parameters                    |        |                                           |             |             |                                                                                                                                                                                                                                                                                                                                            |
| Efficiency                              | %      | 29% (33.5%)                               | 31.5% (36%) | 32.5% (37%) | [6]<br>The following efficiency penalty are assumed in comparison to supercritical coal power plants without CCS:<br>2020 – 8.5% points<br>2030 – 7% points<br>2040 – 6% points<br>2050 – 5% points<br>Additional efficiency penalty for retrofits: 1.5% points.                                                                           |
| Capacity Utilization                    | %      | 80%                                       | 80%         | 72%         | [5,6]<br>It is anticipated that coal-CCS plants are used more                                                                                                                                                                                                                                                                              |

| Parameters                            | Unit                     | 2020 (2050) <sup>#</sup><br>Low/Mean/High |          |          | References & Comments                                                                                                                                                                                                                                                                                                                                                                   |
|---------------------------------------|--------------------------|-------------------------------------------|----------|----------|-----------------------------------------------------------------------------------------------------------------------------------------------------------------------------------------------------------------------------------------------------------------------------------------------------------------------------------------------------------------------------------------|
| Factor (CUF)                          |                          |                                           |          |          | effectively than coal without CCS plants.                                                                                                                                                                                                                                                                                                                                               |
| Fuel Costs Assumptions                |                          |                                           |          |          |                                                                                                                                                                                                                                                                                                                                                                                         |
| Import Share                          | %                        | 0                                         | 30       | 100      |                                                                                                                                                                                                                                                                                                                                                                                         |
| Net calorific value for Indian coal   | MJ/kg                    | 18                                        |          |          | [5,11]                                                                                                                                                                                                                                                                                                                                                                                  |
| Net calorific value for Imported coal | MJ/kg                    | 25                                        |          |          | [6]                                                                                                                                                                                                                                                                                                                                                                                     |
| Price of hard coal                    | \$/ton                   | 36 (118)                                  | 50 (126) | 80 (145) | [2,12]<br>Three scenarios are assumed:<br>(a) Low – 100% Domestic coal fuel; Domestic coal prices are escalated by 4%/year from 2020 till 2050 [13]<br>(b) High – 100% Imported coal fuel; Imported coal prices are assumed to escalate at lower rate than domestic prices, that is, 2%/year from 2020 till 2050<br>(c) Mean – 70/30 mix of domestic (low) & imported (high) coal fuel. |
| Emission Factor                       | gCO <sub>2</sub> /kWh-th | 345                                       | 344      | 341      | [14–16]<br>Low – Domestic coal; High – Imported coal; Mean – 70/30 mix of domestic and imported coal fuel.                                                                                                                                                                                                                                                                              |
| CCS Parameters                        |                          |                                           |          |          |                                                                                                                                                                                                                                                                                                                                                                                         |
| CO <sub>2</sub> Capture Rate          | %                        | 90%                                       |          |          | [6]<br>The nominal capture rate (90%) is considered in this study throughout; however, the net capture rate is smaller than the nominal rate due to the penalty associated with adding CCS system to the coal power plant.                                                                                                                                                              |
| CO <sub>2</sub> transport distance    | km                       | 350                                       | 350      | 500      | [6]                                                                                                                                                                                                                                                                                                                                                                                     |
| CO <sub>2</sub> leakage               | %                        | Nil                                       |          |          |                                                                                                                                                                                                                                                                                                                                                                                         |

| Parameters                           | Unit                           | 2020 (2050) <sup>#</sup><br>Low/Mean/High | References & Comments                                     |
|--------------------------------------|--------------------------------|-------------------------------------------|-----------------------------------------------------------|
| from storage sites                   |                                |                                           |                                                           |
| CO <sub>2</sub> transportation costs | \$/ton-CO <sub>2</sub> (100km) | 2.2                                       | [6]<br>CO <sub>2</sub> transportation costs via pipeline. |
| CO <sub>2</sub> Storage Costs        | \$/ton-CO <sub>2</sub>         | 5.3                                       | [18]                                                      |

\* The values from literature are inflation adjusted to 2018 US dollars (<https://www.usinflationcalculator.com/>); wherever applicable, a historic conversion rate of 1\$ = 70 INR is assumed.

# The figures in brackets are authors' estimates for 2050; mentioned only if the figures are changed.



**Table S2.3: Data and assumptions used for estimating the levelized costs of future solar PV power generation in India.**

| Parameters                              | Unit            | 2020 (2050) <sup>#</sup><br>Low/Mean/High |           |           | References & Comments                                                                                                                                                                                                                                                                                                                                             |
|-----------------------------------------|-----------------|-------------------------------------------|-----------|-----------|-------------------------------------------------------------------------------------------------------------------------------------------------------------------------------------------------------------------------------------------------------------------------------------------------------------------------------------------------------------------|
| General cost parameters                 |                 |                                           |           |           |                                                                                                                                                                                                                                                                                                                                                                   |
| Capex<br>(Overnight)                    | \$/kW           | 479 (237)                                 | 486 (241) | 600 (297) | [19,20]<br>We assume solar-PV capacities will quadruple between 2020 and 2030, and hence we apply 2 times doubling for its Capex learning rate; During 2030 to 2050, we assume the installed capacities will double every decade.<br>Further, we use short term learning rate of 20% between 2020-2030 and long term learning rate of 12% between 2030-2050 [21]. |
| Cost Overruns                           | %Capex          | 1.5%                                      | 1.5%      | 3.5%      | [4]<br>Unlike conventional plants, renewable power plants have low cost overruns because of their modular nature and hence lower project installation lead time, among other reasons.                                                                                                                                                                             |
| Opex                                    | \$/kW-<br>annum | 14 (7)                                    | 15 (7)    | 18 (9)    | We estimate Opex = 3% of Capex: Based on the average operation and maintenance costs (escalated over 25 years) as per [19,20].                                                                                                                                                                                                                                    |
| Systems Costs                           | \$/MWh          | 13.5                                      |           |           | [9]<br>We account for the grid extension and reinforcement costs plus balancing costs incurred to maintain and operate reserves to tackle short-term electricity fluctuations in the grid due to integration of renewables.                                                                                                                                       |
| Discounting                             |                 |                                           |           |           |                                                                                                                                                                                                                                                                                                                                                                   |
| Depreciation Period (N)                 | Years           | 25                                        | 25        | 25        | We have kept 25 years depreciation period constant across all technologies.                                                                                                                                                                                                                                                                                       |
| Weighted Average Cost of Capital (WACC) | %               | 9%                                        | 10%       | 12%       | [10,19,20,22]<br>Renewables are perceived as low risky investment than coal power plants in the country, and hence have lower WACC [10].                                                                                                                                                                                                                          |
| Capacity Utilization Factor (CUF)       | %               | 22%                                       | 19%       | 16%       | [19,20]                                                                                                                                                                                                                                                                                                                                                           |

**Table S2.4: Data and assumptions used for estimating the levelized costs of future wind power generation in India.**

| Parameters                              | Unit            | 2020 (2050) <sup>#</sup><br>Low/Mean/High |           |           | References & Comments                                                                                                                                                                                                       |
|-----------------------------------------|-----------------|-------------------------------------------|-----------|-----------|-----------------------------------------------------------------------------------------------------------------------------------------------------------------------------------------------------------------------------|
| General cost parameters                 |                 |                                           |           |           |                                                                                                                                                                                                                             |
| Capex<br>(Overnight)                    | \$/kW           | 750 (643)                                 | 786 (674) | 857 (735) | [23,24]<br>We anticipate wind power installed capacities in India will double every decade. We use a constant learning rate of 5% between 2020-2050 [21].                                                                   |
| Cost Overruns                           | %Capex          | 1.5%                                      | 1.5%      | 3.5%      | [4]                                                                                                                                                                                                                         |
| Opex                                    | \$/kW-<br>annum | 15 (13)                                   | 20 (17)   | 26 (22)   | [23,24]<br>We assume Opex = 2%/2.5%/3% of Capex for low/mean/high estimates respectively; Based on the average operation and maintenance costs (escalated over 25 years) as per [23,24].                                    |
| Systems Costs                           | \$/MWh          | 14.6                                      |           |           | [9]<br>We account for the grid extension and reinforcement costs plus balancing costs incurred to maintain and operate reserves to tackle short-term electricity fluctuations in the grid due to integration of renewables. |
| Discounting                             |                 |                                           |           |           |                                                                                                                                                                                                                             |
| Depreciation Period                     | Years           | 25                                        | 25        | 25        | We have kept 25 years depreciation period constant across all technologies.                                                                                                                                                 |
| Weighted Average Cost of Capital (WACC) | %               | 9%                                        | 10%       | 12%       | [23–25]<br>Renewables are perceived as low risky investment than coal power plants in the country, and hence have lower WACC [10].                                                                                          |
| Capacity Utilization Factor (CUF)       | %               | 32%                                       | 29%       | 20%       | [23,24,26]                                                                                                                                                                                                                  |

\* The values from literature are inflation adjusted to 2018 US dollars (<https://www.usinflationcalculator.com/>); wherever applicable, a historic conversion rate of 1\$ = 70 INR is assumed.

# The figures in brackets are authors' estimates for 2050; mentioned only if the figures are changed.

**Table S2.5: Data summary of Levelized Costs of Electricity Generation (LCOE) results.**

**a. Simple LCOE Results (\$/MWh)**

| \$/MWh   | 2010 | 2020 |     |     | 2030 |     |     | 2040 |     |     | 2050 |     |     |
|----------|------|------|-----|-----|------|-----|-----|------|-----|-----|------|-----|-----|
| Coal     | 40   | 46   | 60  | 80  | 55   | 67  | 86  | 69   | 79  | 94  | 89   | 95  | 104 |
| Coal-CCS | NA   | 88   | 136 | 185 | 97   | 128 | 179 | 103  | 127 | 169 | 125  | 142 | 175 |
| Solar PV | 307  | 33   | 41  | 69  | 21   | 26  | 44  | 19   | 23  | 39  | 16   | 21  | 34  |
| Wind     | 84   | 33   | 42  | 79  | 31   | 40  | 75  | 30   | 38  | 72  | 28   | 36  | 68  |

**b. Comparison of Advanced and Simple LCOE Results for 2030 and 2050 (\$/MWh)**

|          | 2030 |       | 2050 |       |
|----------|------|-------|------|-------|
| \$/MWh   | LCOE | aLCOE | LCOE | aLCOE |
| Coal     | 67   | 145   | 95   | 173   |
| Coal-CCS | 128  | 143   | 142  | 155   |
| Solar PV | 26   | 40    | 21   | 34    |
| Wind     | 40   | 55    | 36   | 51    |

### S3: Climate Footprint

**Table S3.1: Data and assumptions used for estimating Life Cycle GHG emissions.**

| Source   | Life Cycle GHG emissions<br>kgCO <sub>2</sub> eq./MWh |      |      | Reference Details / Comments                                                                                                                                                                                                                                                                                                           |
|----------|-------------------------------------------------------|------|------|----------------------------------------------------------------------------------------------------------------------------------------------------------------------------------------------------------------------------------------------------------------------------------------------------------------------------------------|
|          | Min                                                   | Mean | Max  |                                                                                                                                                                                                                                                                                                                                        |
| Coal     | 949                                                   | 949  | 1020 | We assume the top quintile power plants from [27] represent the performances of India's newly built super-critical coal power plants.                                                                                                                                                                                                  |
| Coal-CCS | 180                                                   | 247  | 530  | Own estimations based on our meta-analysis on the percentage decrease in the GHG emissions of coal power plants after integrating with post-combustion CCS technologies [6,28–36]; We estimate the possible min/mean/max percentage GHG emission reductions for Indian coal-CCS power plants in future would be 48%/74%/81% [6,28,29]. |
| Solar PV | 10                                                    | 30   | 80   | [37]; Ground-Mounted Photovoltaic systems - Lower value for thin films at high radiation and higher value for C-Si PV at low radiation.                                                                                                                                                                                                |
| Wind     | 2                                                     | 16   | 81   | [38]; Life cycle performance values of Onshore, Large Wind Turbines.                                                                                                                                                                                                                                                                   |

**Table S3.2: Meta-analysis on the percentage decrease in the GHG emissions of coal power plants after integrating with CCS.**

| Study                            | Percentage decrease in GHG emissions<br>when equipped with CCS* |
|----------------------------------|-----------------------------------------------------------------|
| Viebahn et al. [6]               | 74%                                                             |
| Cuellar-Franca and Azapagic [28] | 75-81%                                                          |
| Petrescu et al. [29]             | 48-59%                                                          |
| Pehnt and Henkel [30]            | 78%                                                             |
| Odeh and Cockerill [31]          | 71%                                                             |
| Viebahn et al. [32]              | 66%                                                             |
| Korre et al. [33]                | 79%                                                             |
| Koornneef et al. [34]            | 79%                                                             |
| Singh et al. [35]                | 74%                                                             |
| Viebahn [36]                     | 67-72%                                                          |

\* Post combustion CCS with super-critical coal

#### S4: Water Footprint

**Table S4.1: Data and assumptions used for estimating Life Cycle Water Consumption.**

| Source   | Life Cycle Water Consumption<br>L/MWh<br>Min/Mean/Max |       |       | Reference Details / Comments                                                                                                                                                                                                                                                                                                                                                                                                                                          |
|----------|-------------------------------------------------------|-------|-------|-----------------------------------------------------------------------------------------------------------------------------------------------------------------------------------------------------------------------------------------------------------------------------------------------------------------------------------------------------------------------------------------------------------------------------------------------------------------------|
| Coal     | 2,215                                                 | 2,575 | 2,904 | Own estimations based on [39] for fuel cycle and power plant life cycle data; Opencast mining is assumed for fuel cycle as it accounts for more than 93% of coal mining in India [40]; For power plant operations, water use data taken from [41,42]; Re-circulating type cooling systems are assumed for power plant operations as nearly 90% of Indian coal power plants use this cooling technology [42].                                                          |
| Coal-CCS | 3,799                                                 | 5,098 | 5,746 | Own estimations based on our meta-analysis on the percentage increase in the life cycle water consumption of coal power plants after integrating with post-combustion CCS technologies [39,43–46]. Fuel cycle and power plant life cycle water use: 31% increase from conventional Coal power plants [39]; For power plant operations, we assume Min/Max of 72%/106% increase based on [43,44]; Mean is taken as 100% increase based on the argumentation of [43,45]. |
| Wind     | 1                                                     | 6     | 42    | [39]                                                                                                                                                                                                                                                                                                                                                                                                                                                                  |
| Solar PV | 23                                                    | 244   | 892   | Lower value for thin films-flat panel [39]; Higher value for C-Si PV-flat panel from [39]; Mean value is own estimation: Power plant life cycle data – Average of C-Si and thin films median values from [39]; Operations – India specific data from [42] (80 L/MWh).                                                                                                                                                                                                 |

**Table S4.2: Meta-analysis on the percentage increase in the operational water consumption of coal power plants after integrating with CCS.**

| Study                     | Percentage increase in the operational water consumption when equipped with CCS* |
|---------------------------|----------------------------------------------------------------------------------|
| Meldrum et al. [39]       | 76%                                                                              |
| Sharma and Mahapatra [43] | 81% - 106%                                                                       |
| Ou et al. [44]            | 72%                                                                              |
| Zhai et al. [45]          | 83% (or 2x)                                                                      |
| Jin et al. [46]           | 77%                                                                              |

\* Post combustion CCS with super-critical coal and recirculating cooling tower

## **S5: What it takes to run 150 GW of coal-CCS for 40 years.**

### Assumptions

Deliverable Power Capacity of CCS: 150 GW

Capacity Factor: 80%

Time duration: 40 years

Annual GHG emissions of India = 3.3 Gt (approximate; [47])

Annual domestic water demand of India = 55 billion cubic-meters (approximate; [48])

Cumulative estimations for 40 years (approximate calculations based on mean values)

Electricity generated by 150 GW coal-CCS = 4.2E+10 MWh

GHG emissions: Coal-CCS = 10.4 Gt; Solar PV/Wind (70/30 mix) = 1.1 Gt

Water consumption: Coal-CCS = 214 billion cubic-meters; Solar PV/Wind (70/30 mix) = 7 billion cubic-meters

### **References**

- [1] Central Electricity Authority, Ministry of Power, Government of India CEA. National Electricity Plan (Volume I): Generation. 2018.
- [2] International Energy Agency IEA. World Energy Outlook. 2018.
- [3] International Energy Agency IEA. Power generation assumptions in the World Energy Outlook 2016. 2016.
- [4] Ram M, Child M, Aghahosseini A, Bogdanov D, Lohrmann A, Breyer C. A comparative analysis of electricity generation costs from renewable, fossil fuel and nuclear sources in G20 countries for the period 2015-2030. J Clean Prod 2018;199:687–704.
- [5] Center for Study of Science, Technology and Policy CSTEP. Benefit Cost Analysis of Emission Standards for Coal-based Thermal Power Plants in India. 2018.
- [6] Viebahn P, Vallentin D, Höller S. Prospects of carbon capture and storage (CCS) in India's power sector-An integrated assessment. Appl Energy 2014;117:62–75.
- [7] LAZARD. Lazard's Levelized Cost of Energy Analysis – Version 13.0. 2019.
- [8] Ricke K, Drouet L, Caldeira K, Tavoni M. Country-level social cost of carbon. Nat Clim Chang 2018;8:895–900.
- [9] Samadi S. The social costs of electricity generation—Categorising different types of costs and evaluating their respective relevance. Energies 2017;10:356.
- [10] Climate Policy Initiative CPI. An Assessment of India's Energy Choices : Managing India's Renewable Energy Integration through Flexibility. 2018.
- [11] International Energy Agency IEA. WEO-2015 Special Report: India Energy Outlook. 2015.
- [12] Central Electricity Regulatory Commission, Government of India CERC. Consultation Paper on Terms And Conditions of Tariff Regulations for Tariff Period 1.4.2019 to 31.3.2024. 2018.
- [13] Spencer T, Pachouri R, Renjith G, Vohra S. Coal transition in India. The Energy and Resources Institute (TERI). 2018.

- [14] Mohan RR, Dharmala N, Ananthakumar MR, Kumar P, Bose A. Greenhouse Gas Emission Estimates from the Energy Sector in India at the Sub-national Level (Version/edition 2.0). New Delhi: 2019.
- [15] International Energy Agency IEA. Cleaner Coal in China. Paris: 2009.
- [16] Eggleston S, Buendia L, Miwa K, Ngara T, Tanabe K. 2006 IPCC guidelines for national greenhouse gas inventories: STATIONARY COMBUSTION. vol. 5. Institute for Global Environmental Strategies Hayama, Japan; 2006.
- [17] Vinca A, Rottoli M, Marangoni G, Tavoni M. The role of carbon capture and storage electricity in attaining 1.5 and 2° C. *Int J Greenh Gas Control* 2018;78:148–59.
- [18] Garg A, Shukla PR, Parihar S, Singh U, Kankal B. Cost-effective architecture of carbon capture and storage (CCS) grid in India. *Int J Greenh Gas Control* 2017;66:129–46.
- [19] Tamil Nadu Electricity Regulatory Commission TNERC. Order on generic tariff for Solar power and related issues. 2019.
- [20] Karnataka Electricity Regulatory Commission KERC. Determination of tariff in respect of Solar Power Projects (including Solar Rooftop Photovoltaic Projects) for FY20. 2019.
- [21] Samadi S. The experience curve theory and its application in the field of electricity generation technologies-A literature review. *Renew Sustain Energy Rev* 2018;82:2346–64.
- [22] Naqvi AI, Saxena P. Unravelling India's 2.44 rupee solar tariff: Refined sensibility or a churlish audacity? PVTECH 2018.
- [23] Tamil Nadu Electricity Regulatory Commission TNERC. Order on generic tariff for Wind power and related issues. 2018.
- [24] Karnataka Electricity Regulatory Commission KERC. Generic Tariff for Wind Power Projects 2019. 2019.
- [25] Chaurasiya PK, Warudkar V, Ahmed S. Wind energy development and policy in India: A review. *Energy Strateg Rev* 2019;24:342–57.
- [26] Central Electricity Regulatory Commission, Government of India CERC. Terms and Conditions for Tariff determination from Renewable Energy Sources. 2016.
- [27] Mallapragada DS, Naik I, Ganesan K, Banerjee R, Laurenzi IJ. Life Cycle Greenhouse Gas Impacts of Coal and Imported Gas-Based Power Generation in the Indian Context. *Environ Sci Technol* 2018;53:539–49.
- [28] Cuéllar-Franca RM, Azapagic A. Carbon capture, storage and utilisation technologies: A critical analysis and comparison of their life cycle environmental impacts. *J CO2 Util* 2015;9:82–102.
- [29] Petrescu L, Bonalumi D, Valenti G, Cormos A-M, Cormos C-C. Life Cycle Assessment for supercritical pulverized coal power plants with post-combustion carbon capture and storage. *J Clean Prod* 2017;157:10–21.
- [30] Pehnt M, Henkel J. Life cycle assessment of carbon dioxide capture and storage from lignite power plants. *Int J Greenh Gas Control* 2009;3:49–66.
- [31] Odeh NA, Cockerill TT. Life cycle GHG assessment of fossil fuel power plants with carbon capture and storage. *Energy Policy* 2008;36:367–80.
- [32] Viebahn P, Nitsch J, Fishedick M, Esken A, Schüwer D, Supersberger N, et al. Comparison of carbon capture and storage with renewable energy technologies regarding structural, economic, and ecological aspects in Germany. *Int J Greenh Gas Control* 2007;1:121–33.
- [33] Korre A, Nie Z, Durucan S. Life cycle modelling of fossil fuel power generation with post-combustion CO2 capture. *Int J Greenh Gas Control* 2010;4:289–300.
- [34] Koornneef J, van Keulen T, Faaij A, Turkenburg W. Life cycle assessment of a pulverized coal power plant with post-combustion capture, transport

and storage of CO<sub>2</sub>. *Int J Greenh Gas Control* 2008;2:448–67.

- [35] Singh B, Strømman AH, Hertwich EG. Comparative life cycle environmental assessment of CCS technologies. *Int J Greenh Gas Control* 2011;5:911–21. <https://doi.org/10.1016/j.ijggc.2011.03.012>.
- [36] Viebahn P. Life Cycle Assessment for Power Plants with CCS. In: Stolten D, Scherer V, editors. *Effic. Carbon Capture Coal Power Plants*, Weinheim: WILEY-VCH; 2011, p. 83–109.
- [37] Leccisi E, Raugei M, Fthenakis V. The energy and environmental performance of ground-mounted photovoltaic systems—a timely update. *Energies* 2016;9:622.
- [38] Kadiyala A, Kommalapati R, Huque Z. Characterization of the life cycle greenhouse gas emissions from wind electricity generation systems. *Int J Energy Environ Eng* 2017;8:55–64.
- [39] Meldrum J, Nettles-Anderson S, Heath G, Macknick J. Life cycle water use for electricity generation: a review and harmonization of literature estimates. *Environ Res Lett* 2013;8:15031.
- [40] Coal Controller's Organisation, Ministry of Coal, Government of India CCO. *Provisional Coal Statistics 2016-17*. 2017.
- [41] Chaturvedi V, Nagar-Koti P, Sugam R, Neog K, Hejazi M. Implications of shared socio-economic pathways for India's long-term electricity generation and associated water demands. 2017.
- [42] IRENA. *Water use in India's power generation: Impact of renewables and improved cooling technologies to 2030*. 2018.
- [43] Sharma N, Mahapatra SS. A preliminary analysis of increase in water use with carbon capture and storage for Indian coal-fired power plants. *Environ Technol Innov* 2018;9:51–62.
- [44] Ou Y, Zhai H, Rubin ES. Life cycle water use of coal-and natural-gas-fired power plants with and without carbon capture and storage. *Int J Greenh Gas Control* 2016;44:249–61.
- [45] Zhai H, Rubin ES, Versteeg PL. Water use at pulverized coal power plants with postcombustion carbon capture and storage. *Environ Sci Technol* 2011;45:2479–85.
- [46] Jin Y, Behrens P, Tukker A, Scherer L. Water use of electricity technologies: A global meta-analysis. *Renew Sustain Energy Rev* 2019;115:109391. <https://doi.org/10.1016/j.rser.2019.109391>.
- [47] World Resources Institute WRI. *ClimateWatch: Global Historical Emissions 2016*. <https://www.climatewatchdata.org/ghg-emissions> (accessed June 3, 2020).
- [48] Central Water Commission, Ministry Of Jal Shakti, Government of India CWC. *Water and Related Statistics*. 2019.
